# Supplementary material
Source: Springer Nature journal article supplement (https://www.springermedizin.de/resource/supplementary/12959_2014_226_MOESM4_ESM.pdf/9569300)
Supplement: MOESM4 [file 9569300]

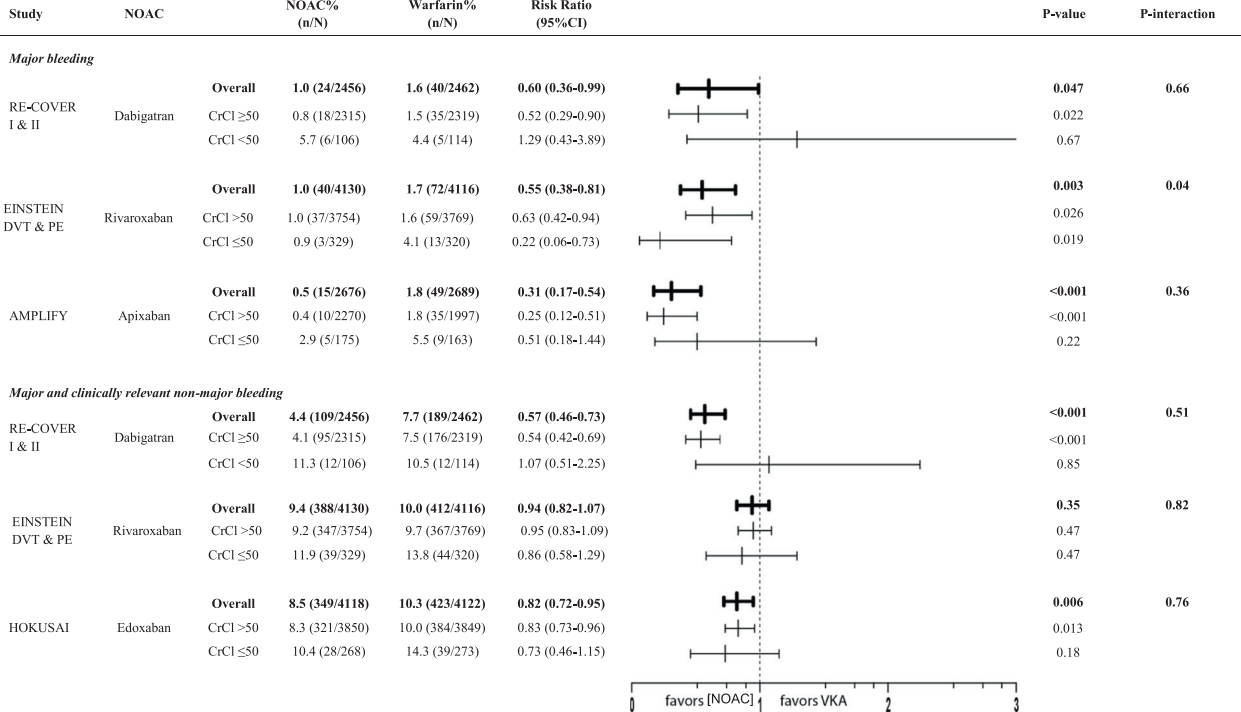

Data for major bleeding in the HOKUSAI trial and major + CRNM bleeding in the AMPLIFY trial were not reported in the original studies
